# Supplementary material for: Radiomics Nomogram Based on Radiomics Score from Multiregional Diffusion-Weighted MRI and Clinical Factors for Evaluating HER-2 2+ Status of Breast Cancer
Source: MDPI journal article supplement (doi:10.3390/diagnostics11081491), 2021-08-18
Supplement: s1 [file s1]

**Table S1.** Radiomic features identified in each Region to distinguish positive from negative HER-2 2+.

| No.                            | Feature Family | Descriptor                     | Statistic | Image               | Location   | Coefficient in LR model |
|--------------------------------|----------------|--------------------------------|-----------|---------------------|------------|-------------------------|
| Intratumoral radiomic features |                |                                |           |                     |            |                         |
| I1                             | Gabor          | $f = 2, \theta = 22.5^\circ$   | Median    | ADC                 | Intratumor | -0.366                  |
| I2                             | Gabor          | $f = 32, \theta = 0^\circ$     | Kurtosis  | DWI <sub>b0</sub>   | Intratumor | 0.404                   |
| I3                             | Laws           | R5S5                           | Skewness  | DWI <sub>b0</sub>   | Intratumor | -0.755                  |
| I4                             | laws           | E5L5                           | Skewness  | ADC                 | Intratumor | -0.617                  |
| I5                             | Gabor          | $f = 16, \theta = 0^\circ$     | Kurtosis  | ADC                 | Intratumor | -0.387                  |
| I6                             | Laws           | E5E5                           | Median    | DWI <sub>b800</sub> | Intratumor | -0.669                  |
| I7                             | Gabor          | $f = 8, \theta = 0^\circ$      | Skewness  | DWI <sub>b0</sub>   | Intratumor | 0.578                   |
| I8                             | Laws           | L5E5                           | Median    | ADC                 | Intratumor | -0.708                  |
| I9                             | Gabor          | $f = 32, \theta = 112.5^\circ$ | Kurtosis  | DWI <sub>b800</sub> | Intratumor | 0.346                   |
| Peritumoral radiomic features  |                |                                |           |                     |            |                         |
| P1                             | Gabor          | $f = 4, \theta = 67.5^\circ$   | Kurtosis  | DWI <sub>b800</sub> | Peritumor  | 0.484                   |
| P2                             | Laws           | E5R5                           | Skewness  | DWI <sub>b0</sub>   | Peritumor  | -0.369                  |
| P3                             | Laws           | W5W5                           | SD        | DWI <sub>b800</sub> | Peritumor  | 0.358                   |
| P4                             | Laws           | R5W5                           | Mean      | DWI <sub>b0</sub>   | Peritumor  | 0.334                   |
| P5                             | Gabor          | $f = 8, \theta = 112.5^\circ$  | Median    | ADC                 | Peritumor  | 0.373                   |
| P6                             | Gabor          | $f = 32, \theta = 112.5^\circ$ | Kurtosis  | DWI <sub>b800</sub> | Peritumor  | 0.394                   |
| P7                             | Gabor          | $f = 8, \theta = 90^\circ$     | Kurtosis  | ADC                 | Peritumor  | 0.404                   |
| P8                             | Laws           | L5E5                           | Median    | ADC                 | Peritumor  | -0.553                  |
| P9                             | Laws           | E5L5                           | Skewness  | ADC                 | Peritumor  | -0.687                  |
| Combined radiomic features     |                |                                |           |                     |            |                         |
| C1                             | Gabor          | $f = 4, \theta = 67.5^\circ$   | Kurtosis  | DWI <sub>b800</sub> | Peritumor  | 0.416                   |
| C2                             | Laws           | E5R5                           | Skewness  | DWI <sub>b0</sub>   | Peritumor  | -0.540                  |
| C3                             | Laws           | R5S5                           | Skewness  | DWI <sub>b0</sub>   | Intratumor | -0.739                  |

|     |       |                             |          |                     |            |        |
|-----|-------|-----------------------------|----------|---------------------|------------|--------|
| C4  | Laws  | E5L5                        | Skewness | ADC                 | Peritumor  | -0.564 |
| C5  | Gabor | $f = 16, \theta = 0^\circ$  | Kurtosis | ADC                 | Intratumor | -0.605 |
| C6  | Gabor | $f = 32, \theta = 0^\circ$  | Kurtosis | DWI <sub>b0</sub>   | Peritumor  | 0.485  |
| C7  | Laws  | W5W5                        | SD       | DWI <sub>b800</sub> | Peritumor  | 0.412  |
| C8  | Gabor | $f = 16, \theta = 45^\circ$ | Median   | ADC                 | Peritumor  | 0.405  |
| C9  | Laws  | R5R5                        | SD       | DWI <sub>b0</sub>   | Intratumor | 0.373  |
| C10 | Gabor | $f = 8, \theta = 90^\circ$  | Skewness | ADC                 | Peritumor  | 0.316  |
| C11 | Laws  | E5E5                        | Median   | DWI <sub>b800</sub> | Intratumor | -0.584 |
| C12 | Gabor | $f = 8, \theta = 0^\circ$   | Skewness | DWI <sub>b0</sub>   | Intratumor | 0.643  |
| C13 | Laws  | L5E5                        | Median   | ADC                 | Intratumor | -0.650 |

---

Abbreviations: SD, standard deviation; LR, logistic regression.

**Intra-rad-score, peri-rad-score, and com-rad-score calculation formulas in predicting HER-2 2+ status:**

$$\text{Intra-rad-score} = -0.506 - 0.366 \times I1 + 0.404 \times I2 - 0.755 \times I3 - 0.617 \times I4 - 0.387 \times I5 \\ - 0.669 \times I6 + 0.578 \times I7 - 0.708 \times I8 + 0.346 \times I9$$

$$\text{Peri-rad-score} = -0.344 + 0.484 \times P1 - 0.369 \times P2 + 0.358 \times P3 + 0.334 \times P4 + 0.373 \\ \times P5 + 0.394 \times P6 + 0.404 \times P7 - 0.553 \times P8 - 0.687 \times P9$$

$$\text{Com-rad-score} = -0.633 + 0.416 \times C1 - 0.540 \times C2 - 0.739 \times C3 - 0.564 \times C4 - 0.605 \\ \times C5 + 0.485 \times C6 + 0.412 \times C7 + 0.405 \times C8 + 0.373 \times C9 + 0.316 \times C10 - 0.584 \times \\ C11 + 0.643 \times C12 - 0.650 \times C13$$
